# Supplementary material
Source: publisher figshare collection journal article supplement (https://frontiersin.figshare.com/ndownloader/files/23855771)
Supplement: Supplementary file [file 23855771]

Appendix D--Detailed Process Flow Chart for Task 7

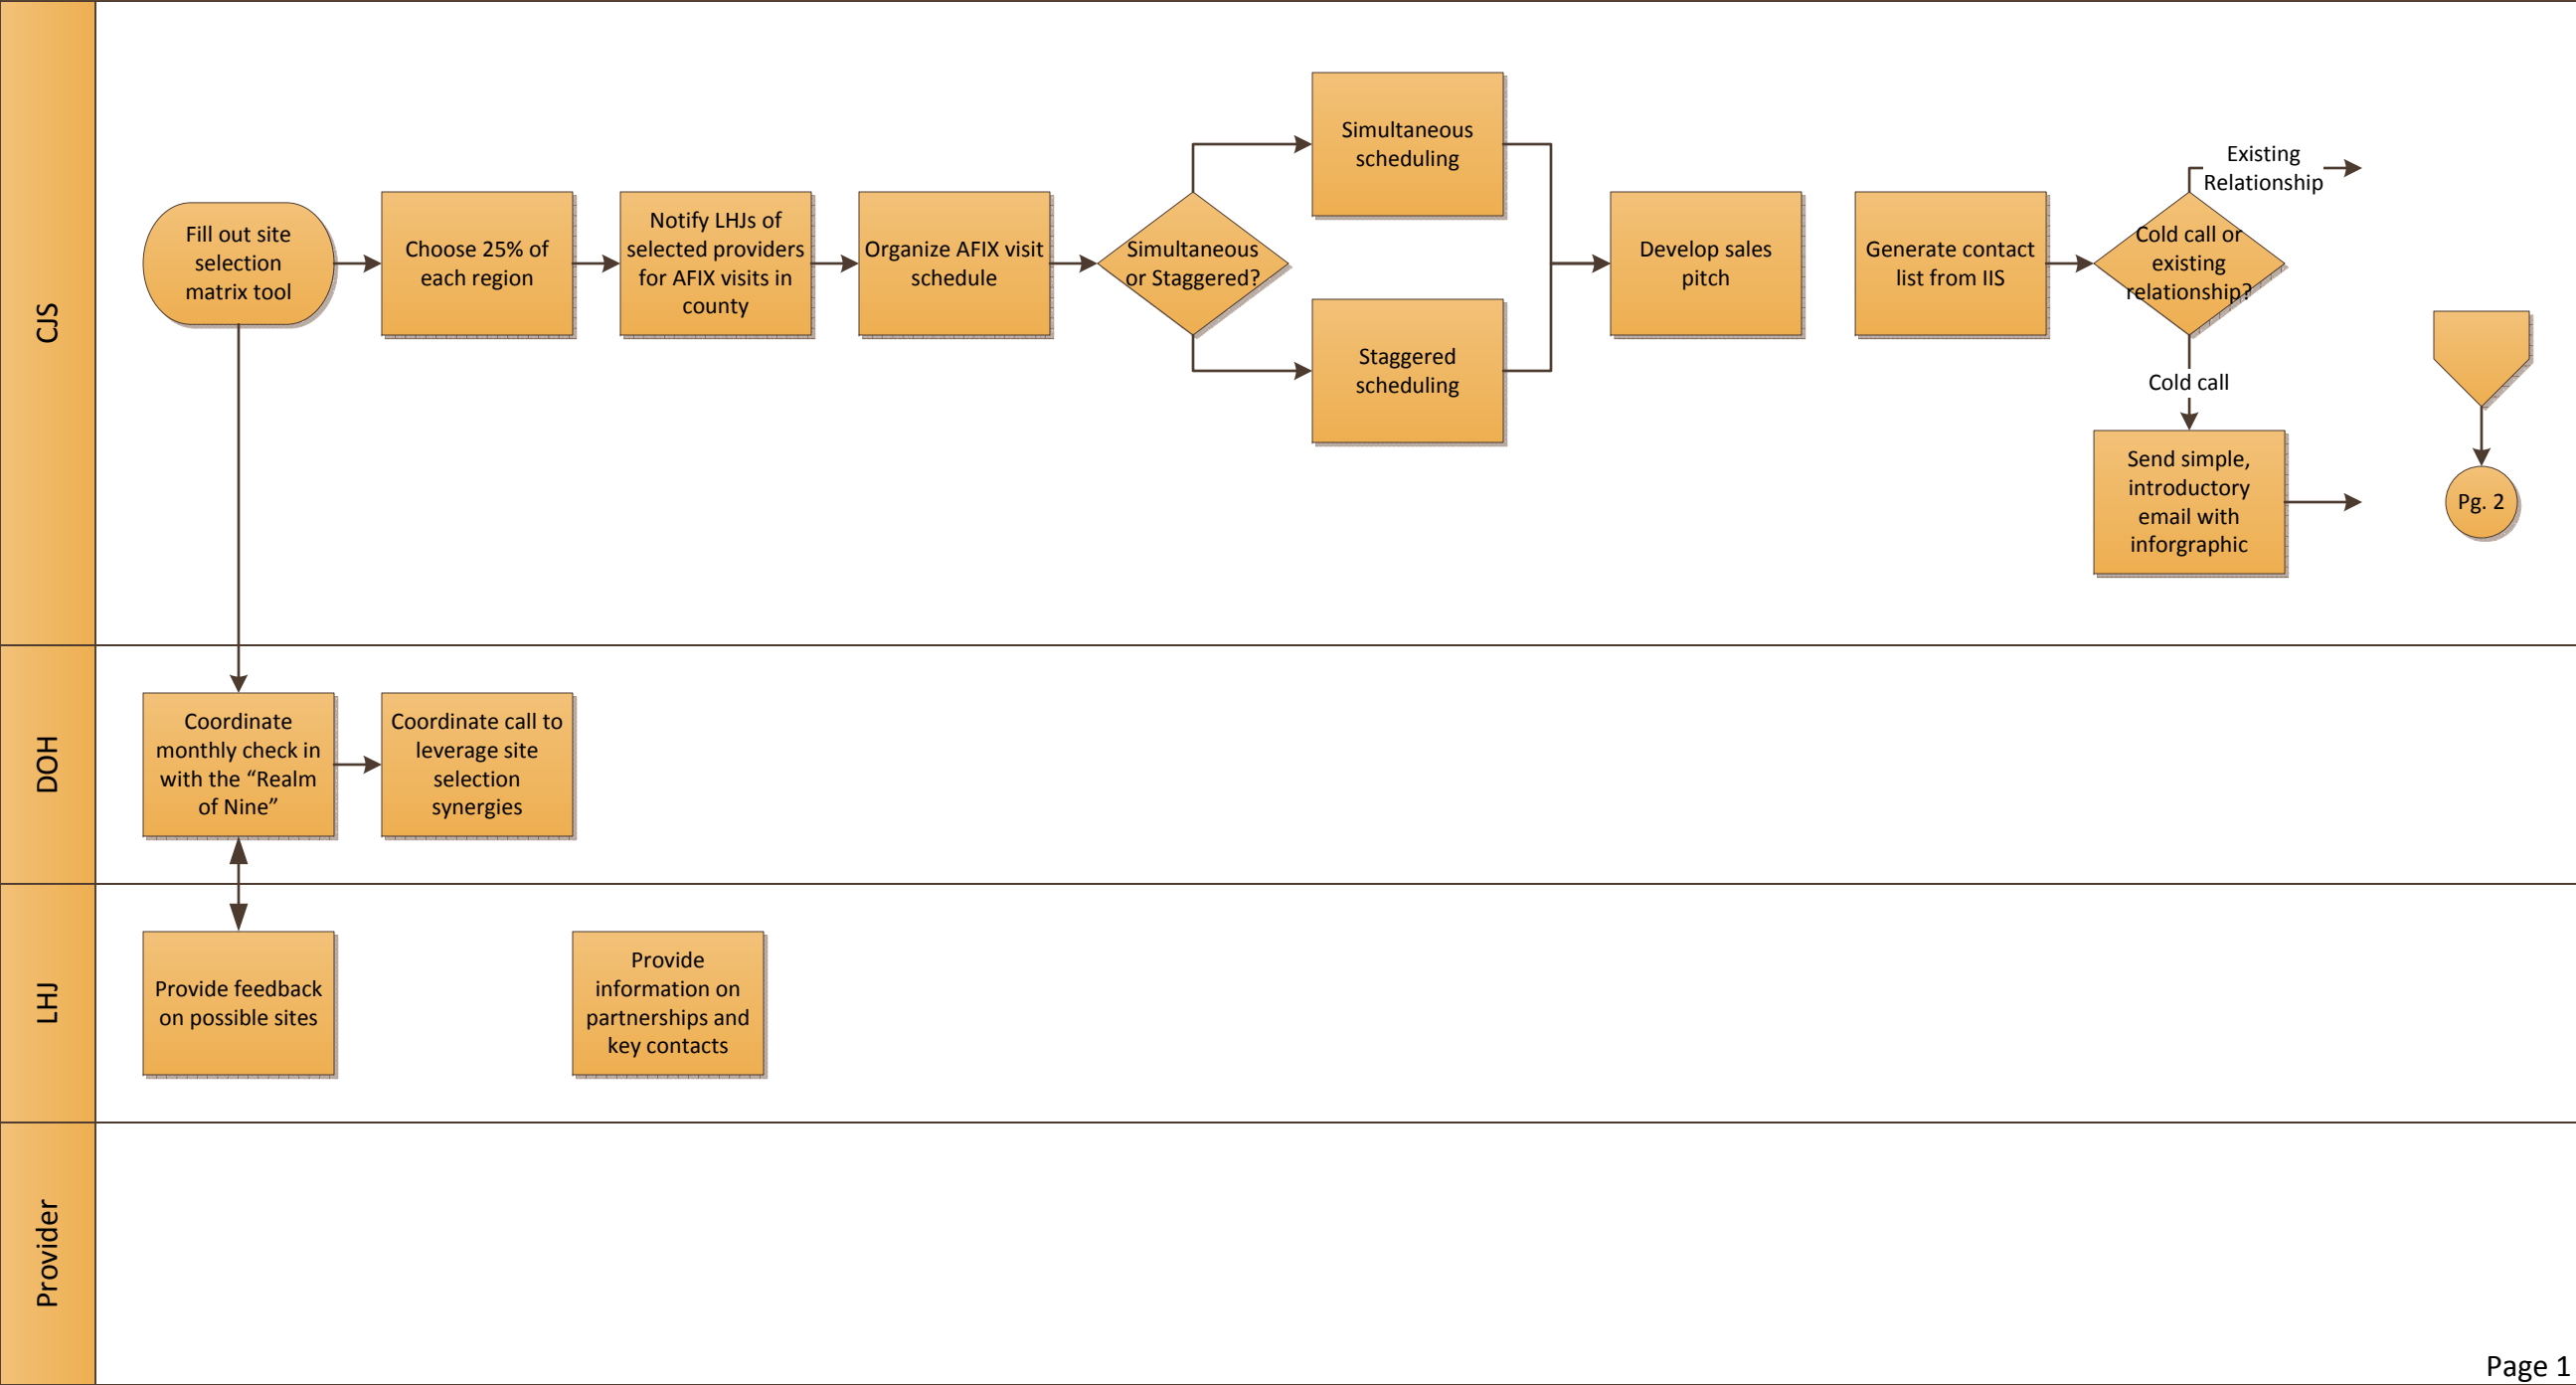

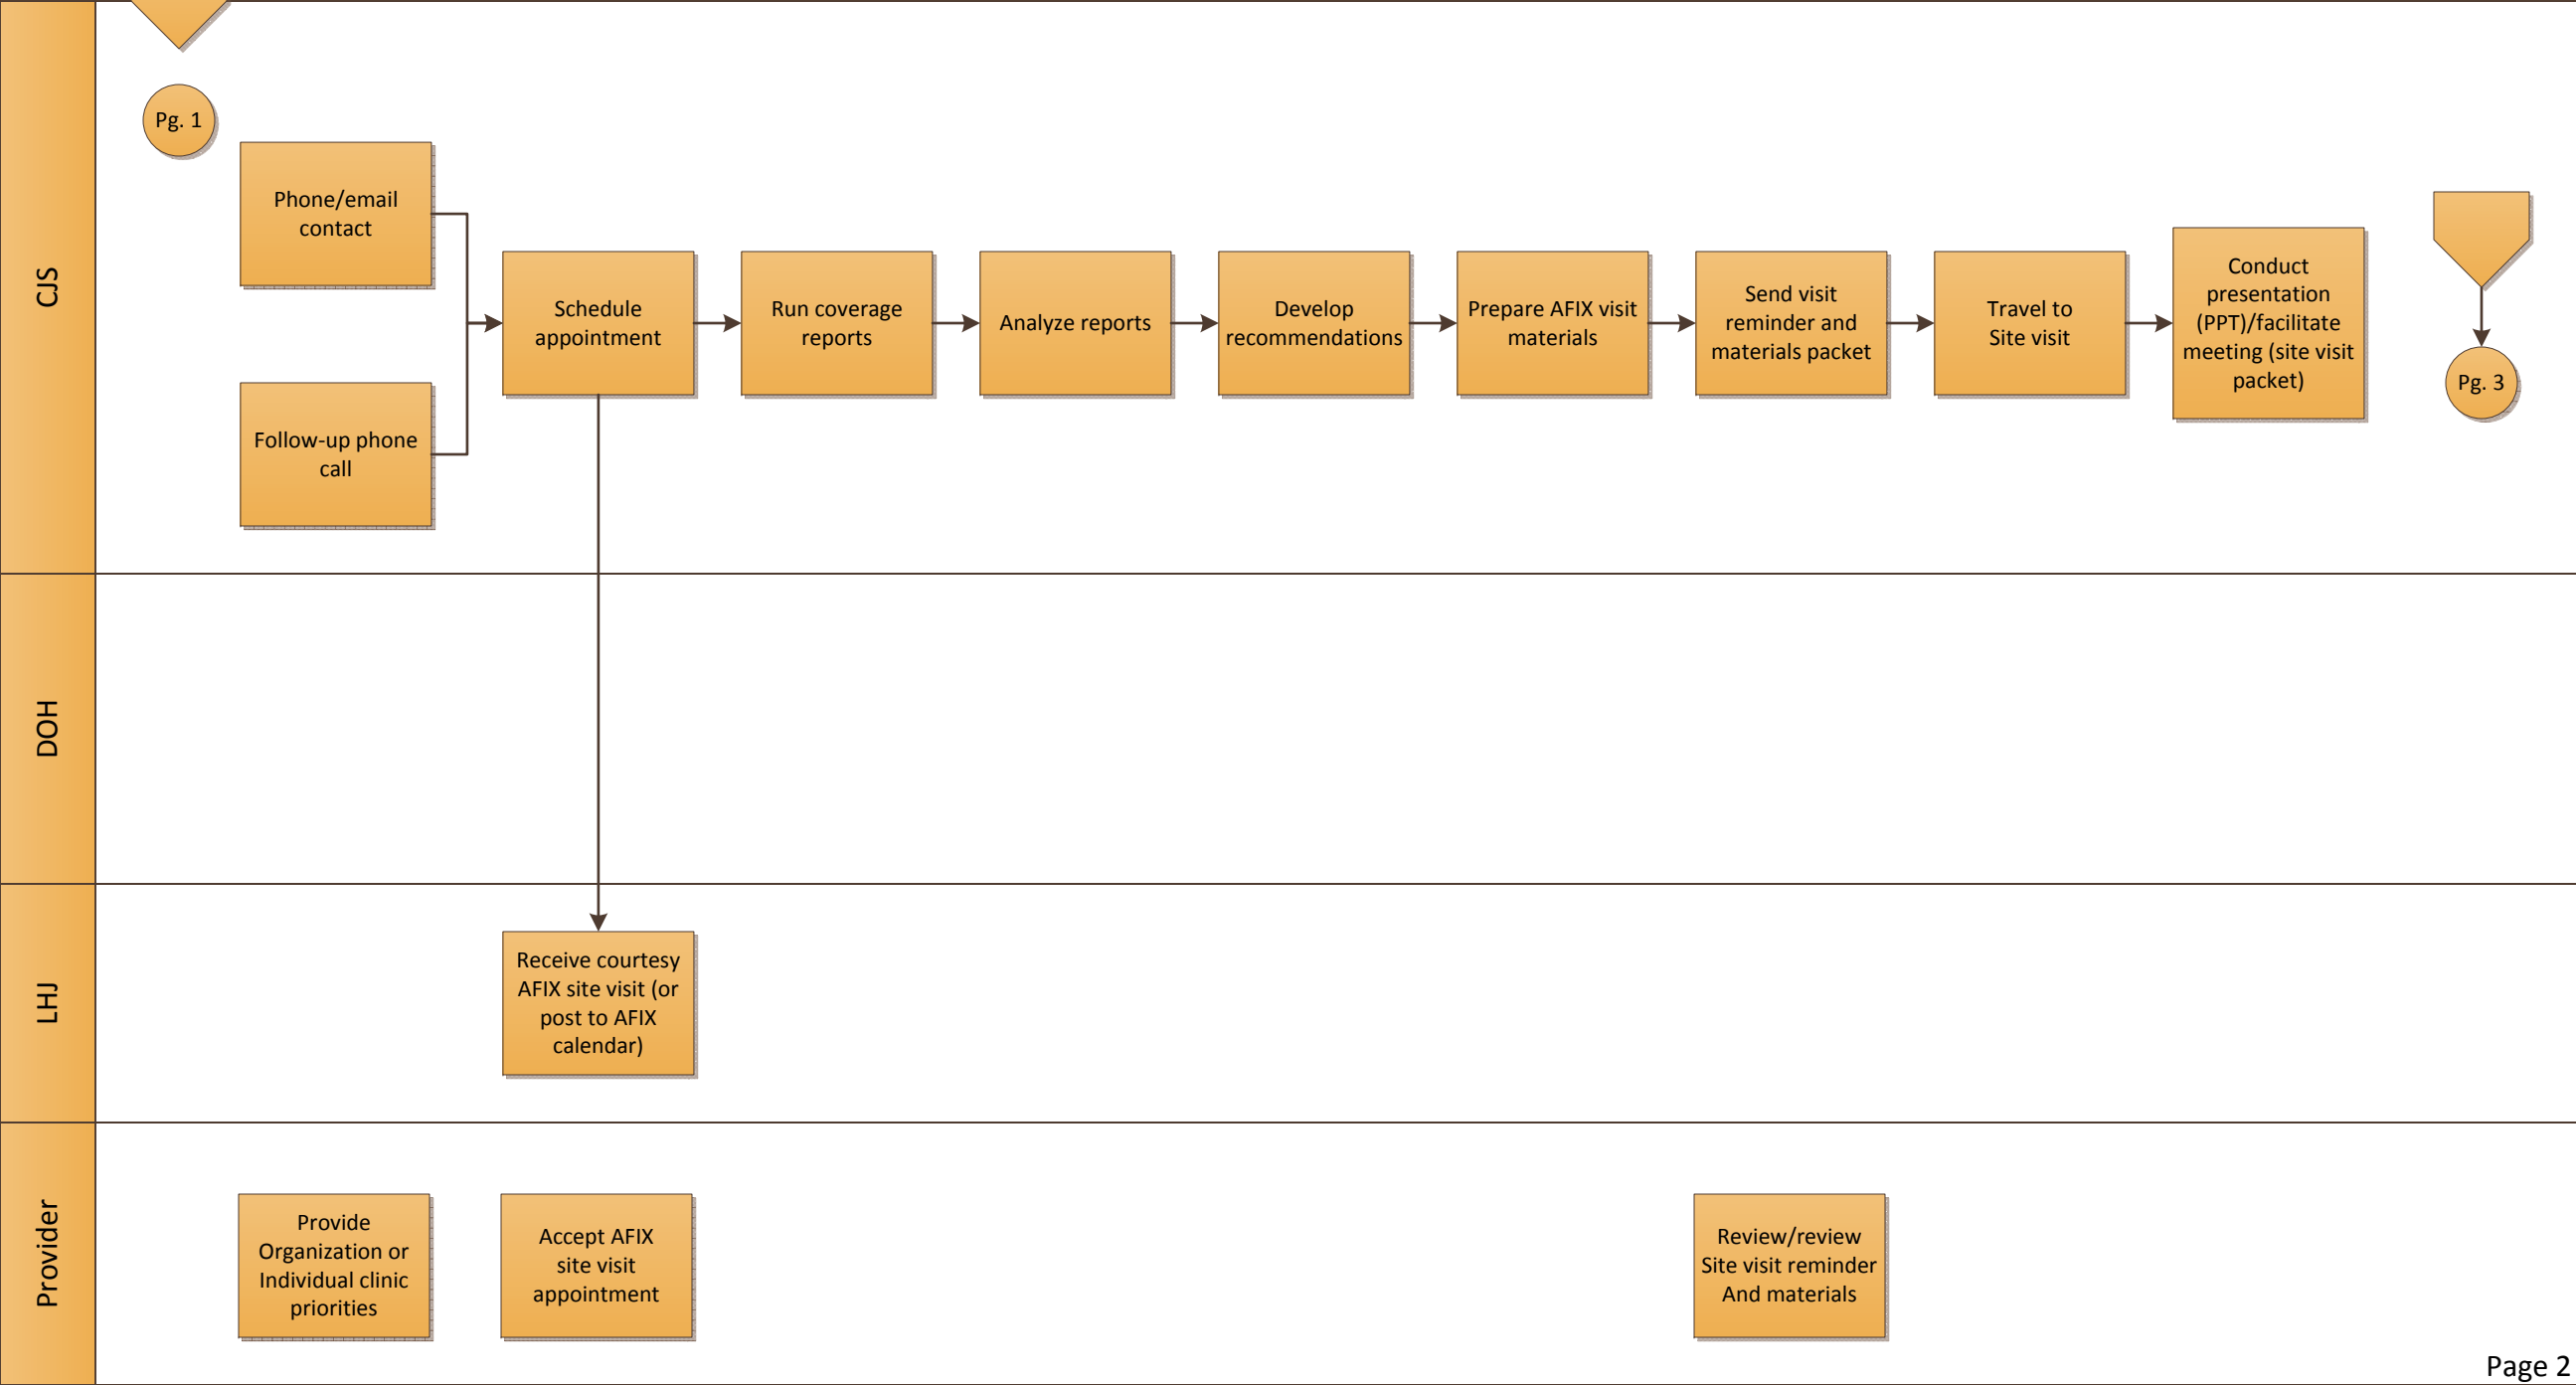

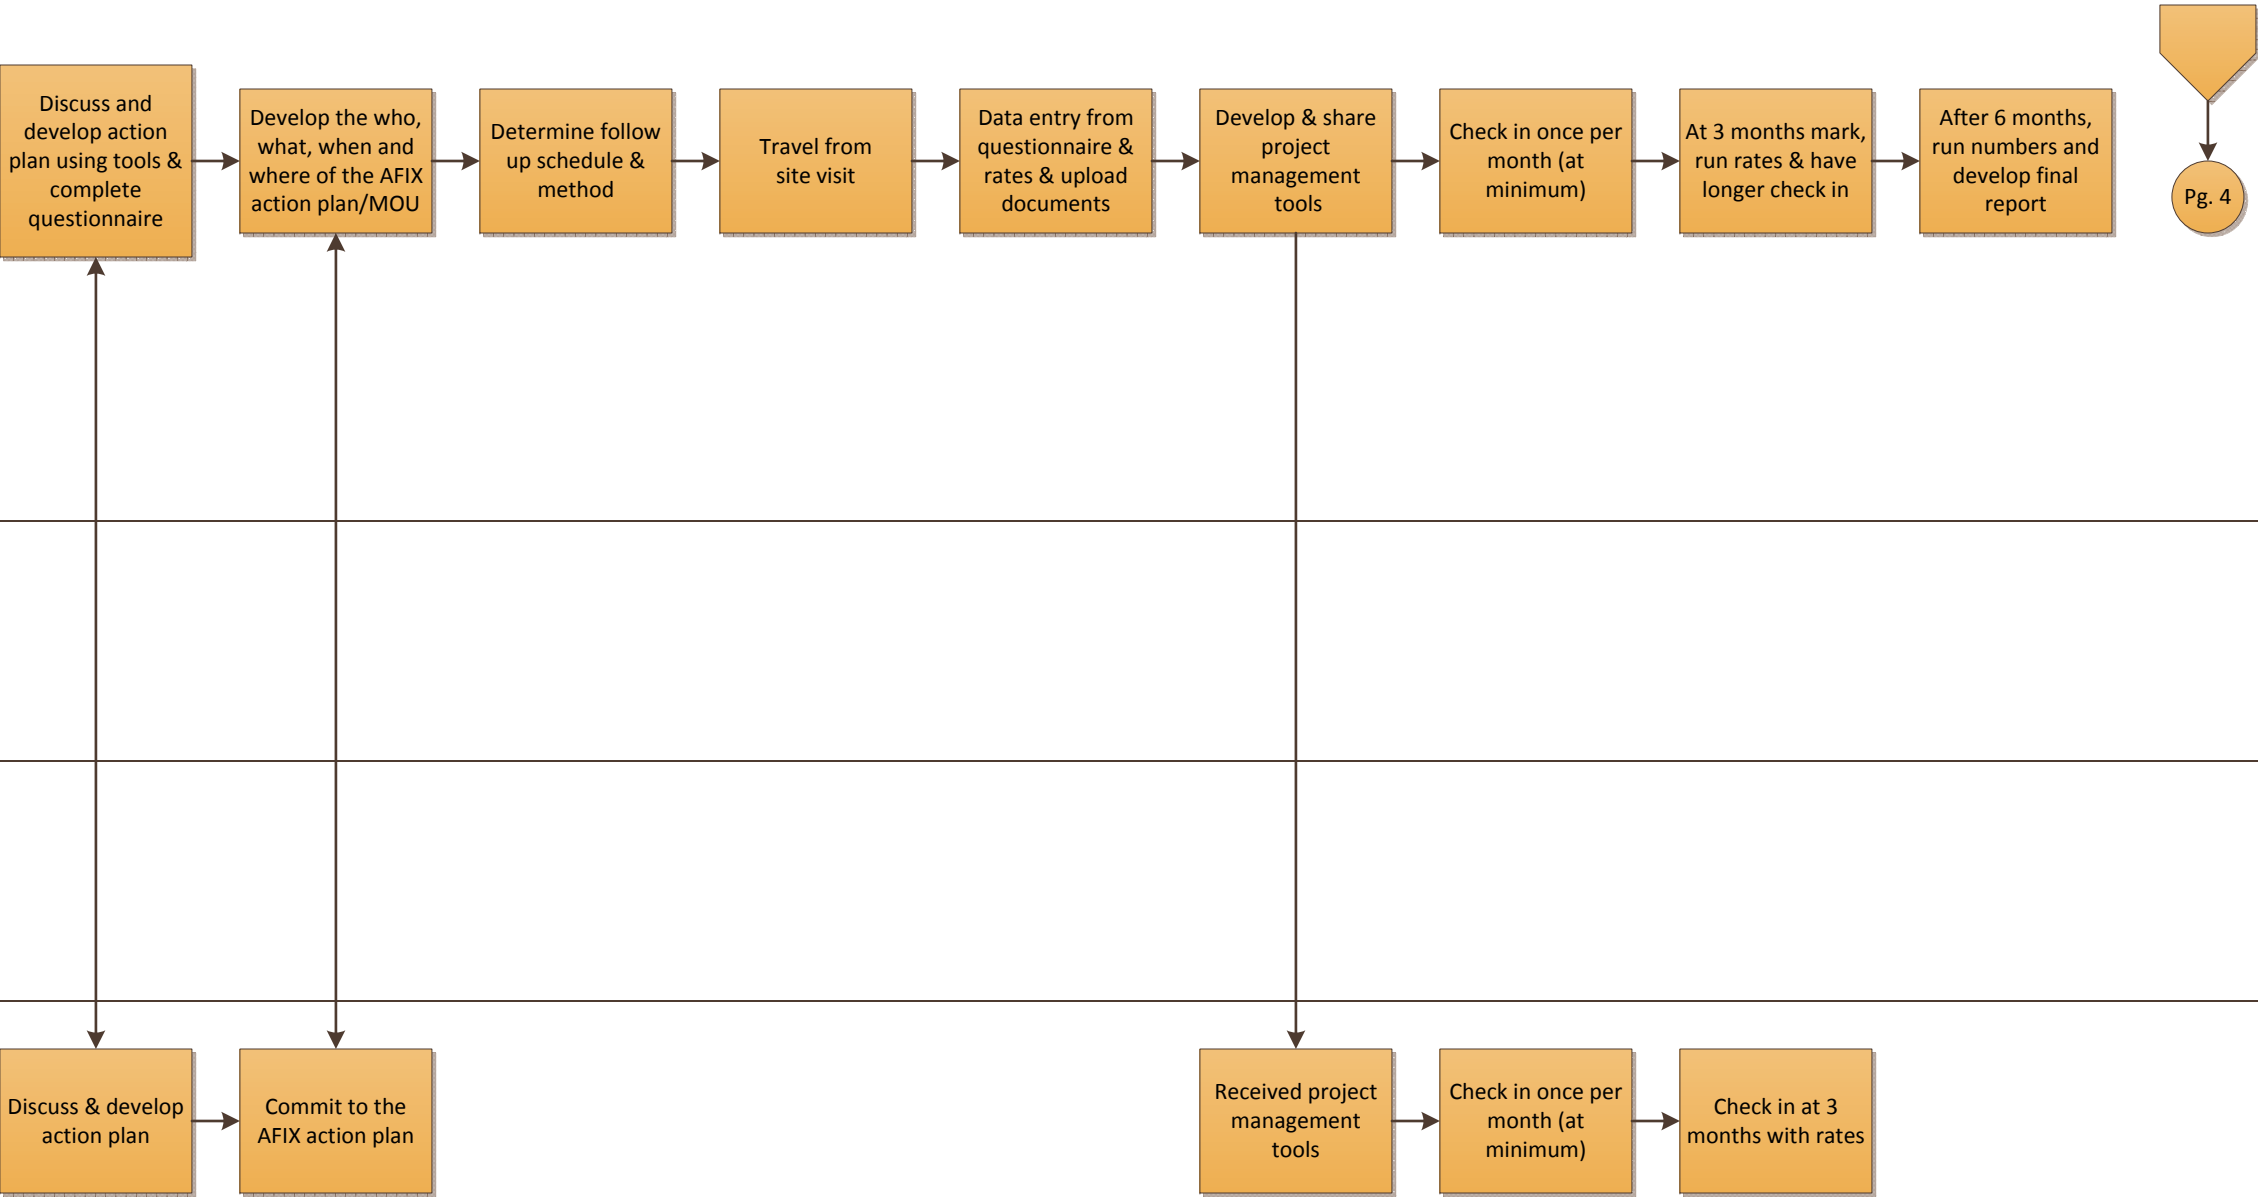

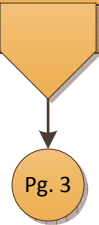

CJS

Share out based on points of contact listed in action plan

Upload all documents & close out visit in PEAR within five business days

DOH

DOH receives data from PEAR

Send customer survey to provider after visit is closed in PEAR

Share out/post annual AFIX report for stakeholders

LHU

Receive annual AFIX report

Provider

Receive AFIX final report

Receive and complete customer satisfaction survey
